# Supplementary figures and images for: Effects of Pain Neuroscience Education and Physiotherapy on Chronic Low Back Pain, Fear of Movement and Functional Status: A Randomised Pilot Study
Source: MDPI journal article supplement (doi:10.3390/jcm13072081), 2024-04-03

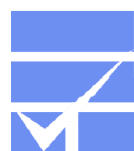

# CONSORT

TRANSPARENT REPORTING of TRIALS

## CONSORT 2010 Flow Diagram

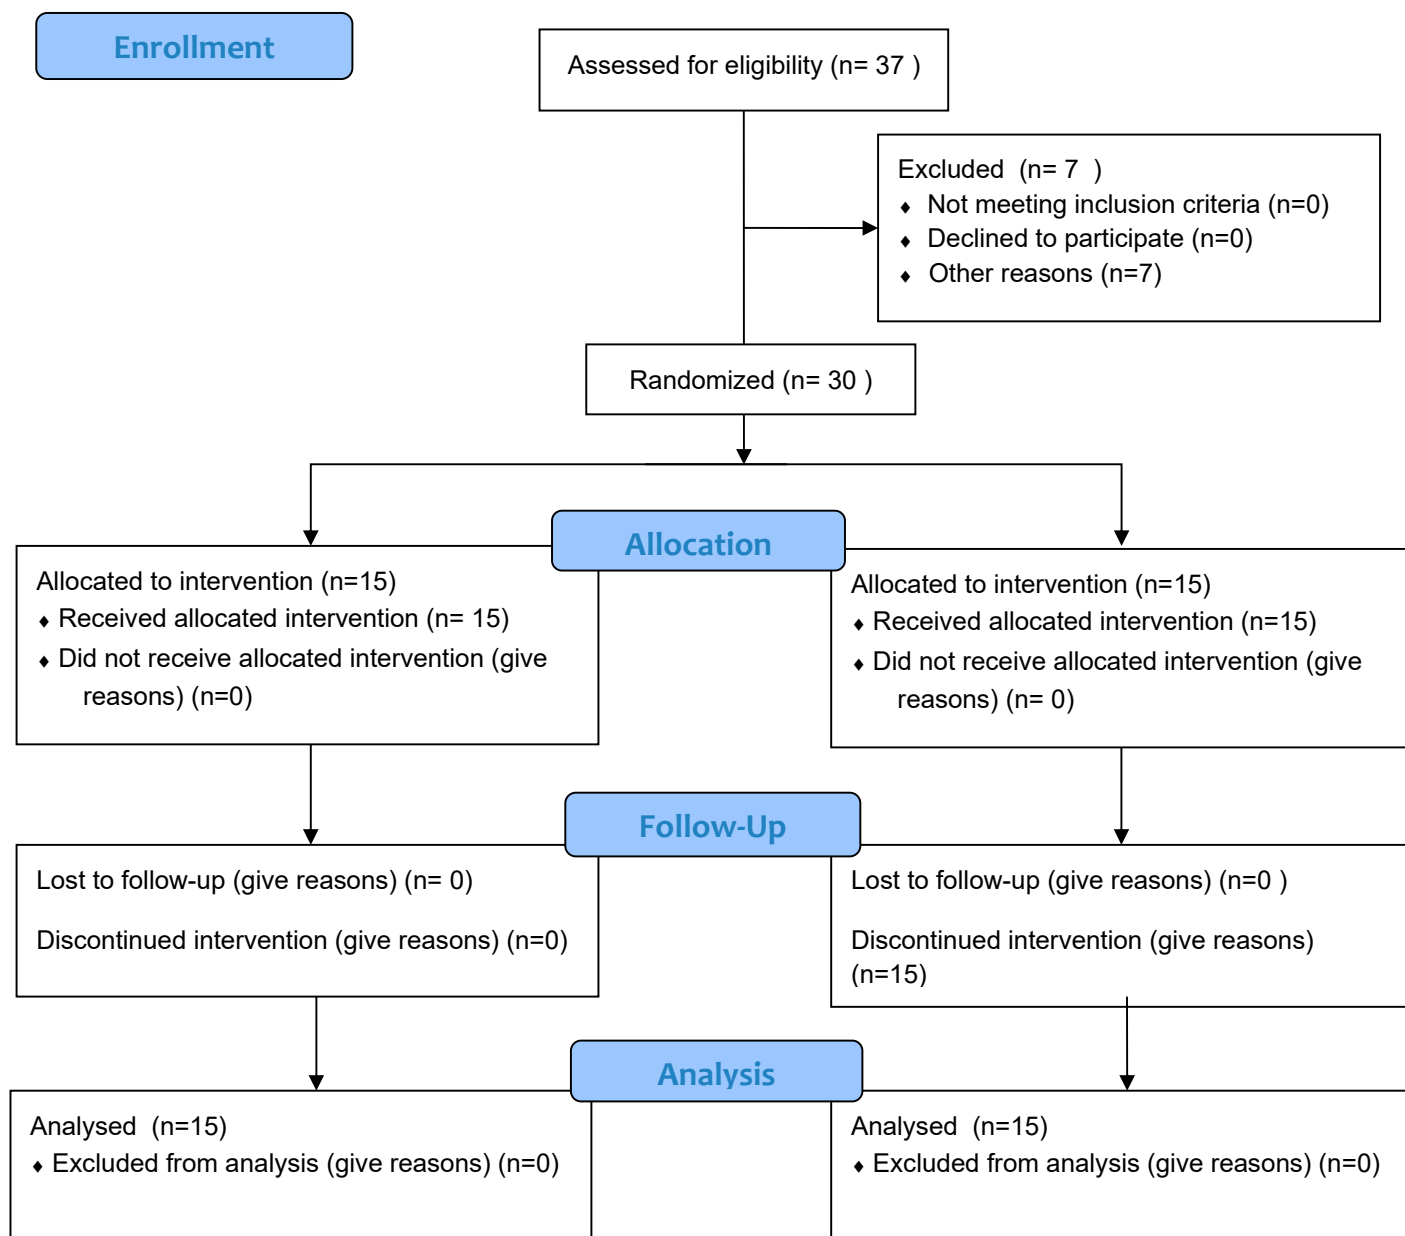

Supplement: s1 [file s1]
